# Supplementary material for: Triindole-cored star-shaped molecules for organic solar cells
Source: Royal Society of Chemistry journal article supplement (doi:10.1039/c3ta11182b), 2013-01-01
Supplement: c3ta11182b.pdf [file c3ta11182b.pdf]

## Supporting information

# Triindole-Cored Star-Shaped Molecules for Organic Solar Cells

Zhen Lu,<sup>a,b</sup> Cuihong Li,<sup>\*a</sup> Tao Fang,<sup>a</sup> Guangwu Li<sup>a</sup> and Zhishan Bo<sup>\*a</sup>

<sup>a</sup> Beijing Key Laboratory of Energy Conversion and Storage Materials, College of Chemistry, Beijing Normal University, Beijing 100875, China. Fax: +86 10 62206891; Tel: + 86 10 62206891; E-mail: licuihong@bnu.edu.cn; zsbo@bnu.edu.cn

<sup>b</sup> College of Chemistry and Chemical Engineering, ShanXi DaTong University, DaTong 037009, China

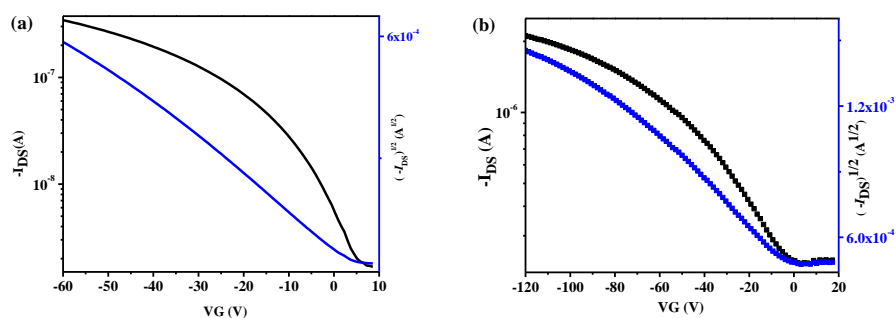

Figure S1. The transfer characteristic curves of spin-coated films of SM-1 (a) and SM-2 (b) on OTS-treated Si/SiO<sub>2</sub> substrates.

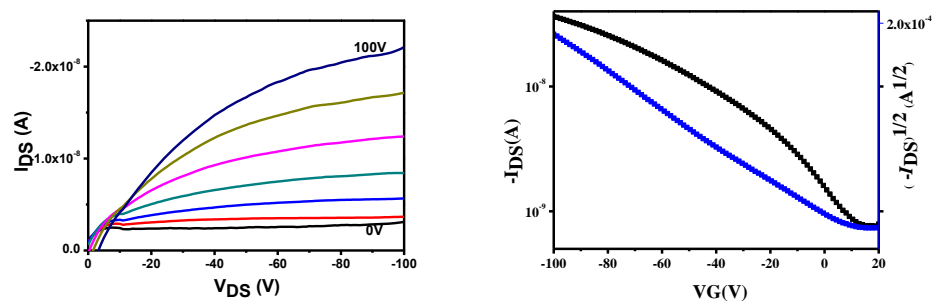

Figure S2. The output and transfer characteristic curves of the blend films of SM-1 and PC<sub>71</sub>BM on OTS-treated Si/SiO<sub>2</sub> substrates.  $\mu = 1.13 \times 10^{-5} \text{ cm}^2 \text{ V}^{-1} \text{ s}^{-1}$

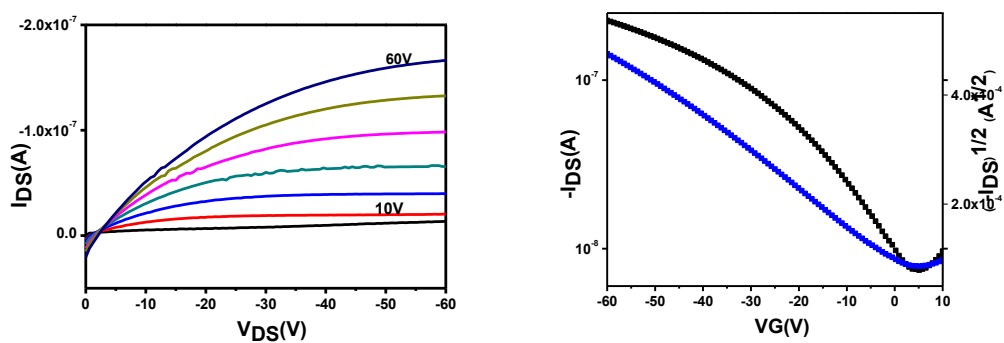

Figure S3. The output and transfer characteristic curves of the blend films of **SM-1** and PC<sub>71</sub>BM on OTS-treated Si/SiO<sub>2</sub> substrates.  $\mu = 2.05 \times 10^{-4} \text{ cm}^2 \text{ V}^{-1} \text{ s}^{-1}$

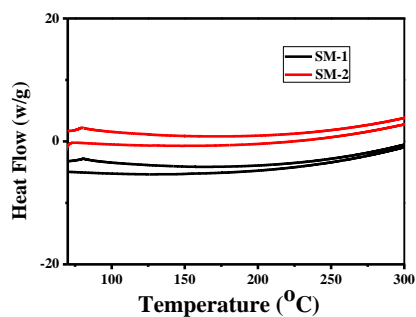

Figure S4. DSC traces of SM-1 and SM-2 measured at a heating rate 20 °C/min and a N<sub>2</sub> flow of 50 mL/min.

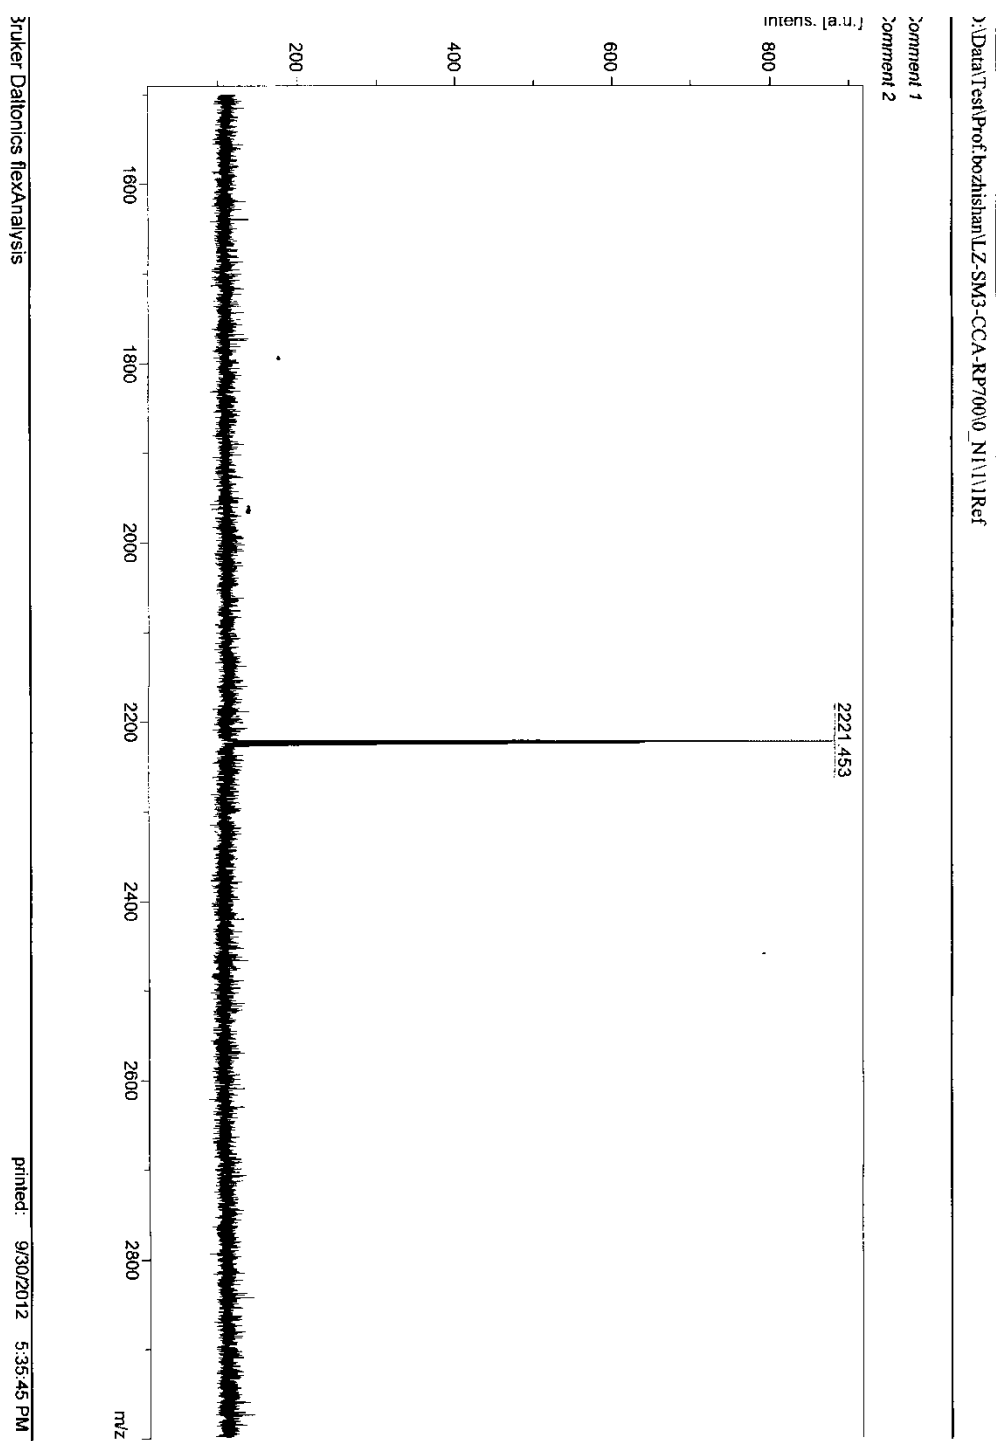

Figure S5. The MAILD-TOF spectra of SM1

## Peking University Mass Spectrometry Sample Analysis Report

**Analysis Info**  
Analysis Name 13031010\_20130322\_0000005.d  
Sample 20130322-Ivan  
Comment ESI Positive

Acquisition Date 3/22/2013 4:25:18 PM  
Instrument Bruker Apex IV FTMS  
Operator Peking University

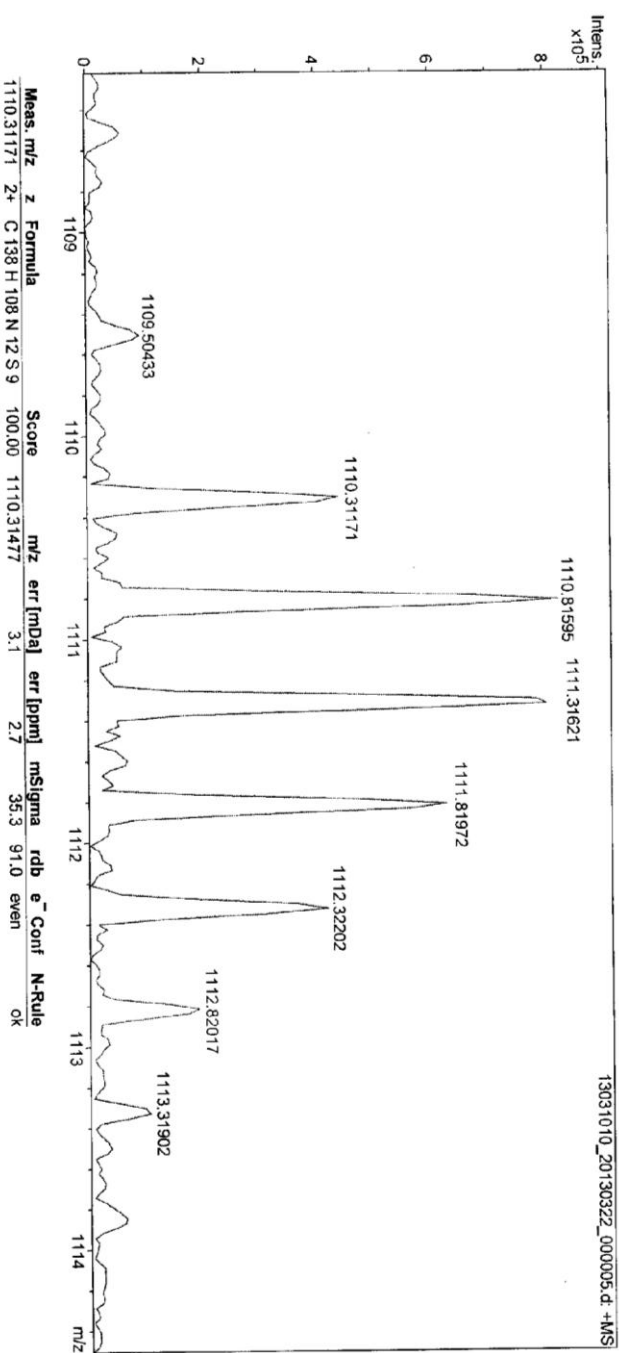

Bruker Compass DataAnalysis 4.0

printed: 3/22/2013 4:35:53 PM

Page 1 of 1

Figure S6. The high resolution MS of SM1

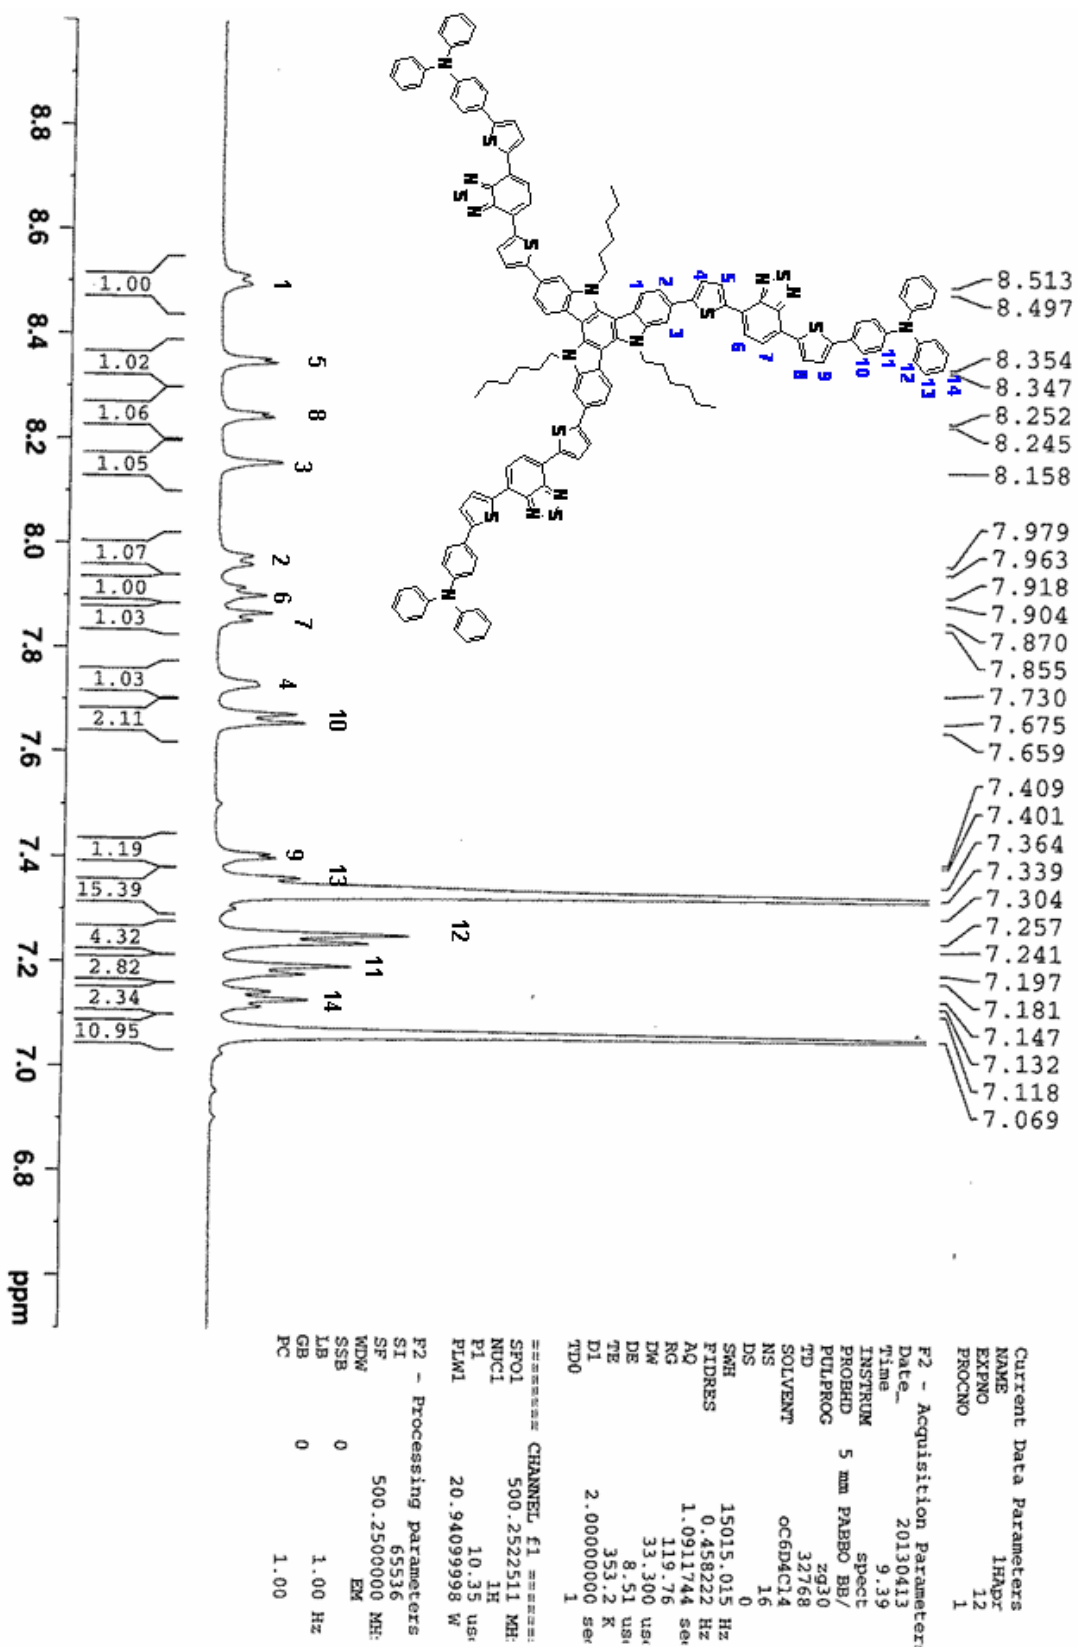

Figure S6. <sup>1</sup>H NMR spectrum of **SM-1** (measured in 1,2-dichlorobenzene-d<sub>4</sub> at 80 °C) and the assignment of the peaks.

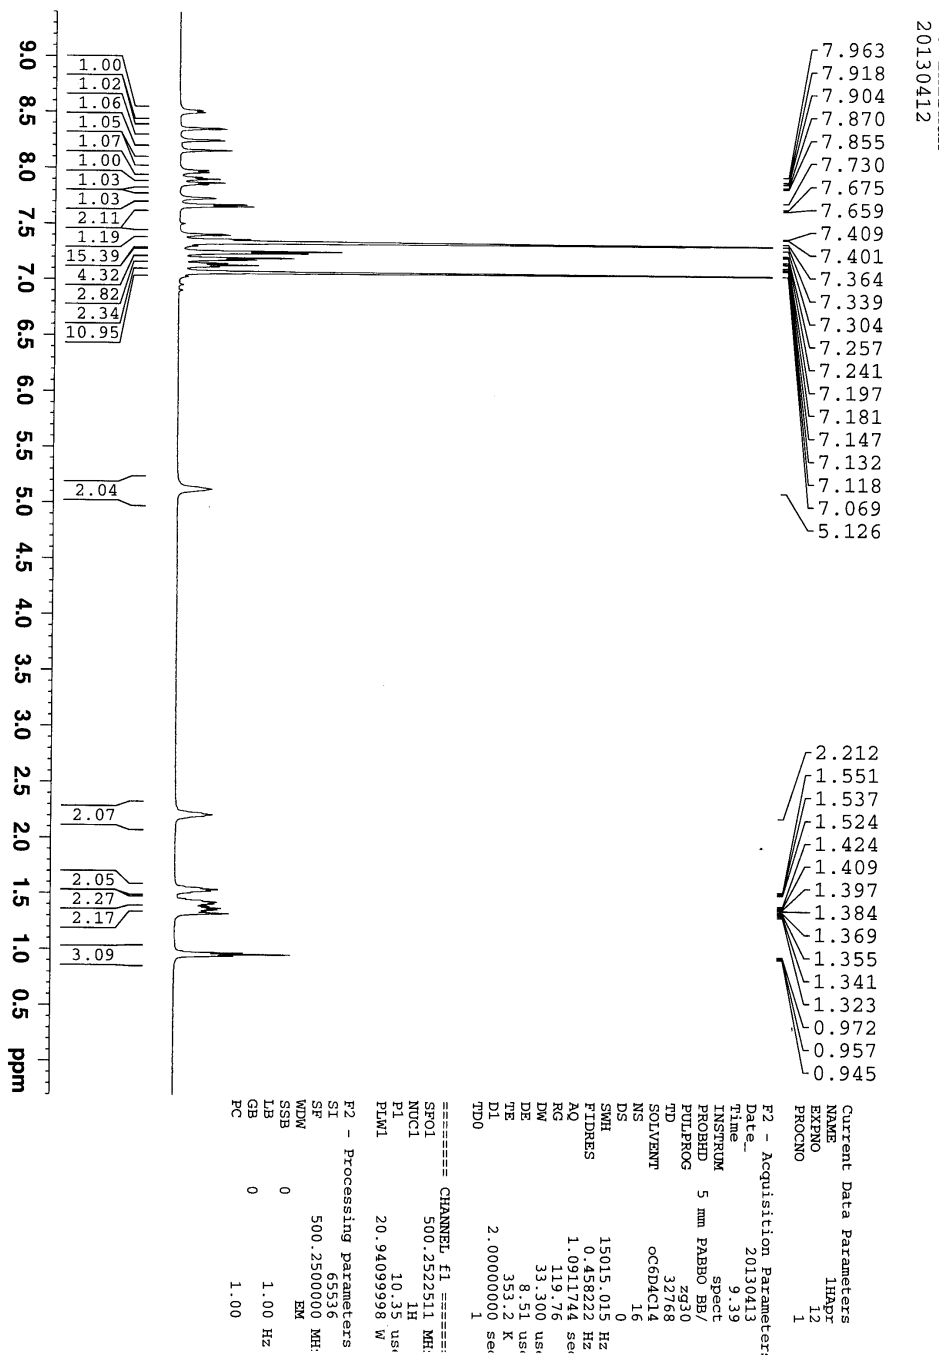

Figure S7.  $^1\text{H}$  NMR spectrum of **SM-1** (measured in 1,2-dichlorobenzene- $d_4$  at 80  $^\circ\text{C}$ ).

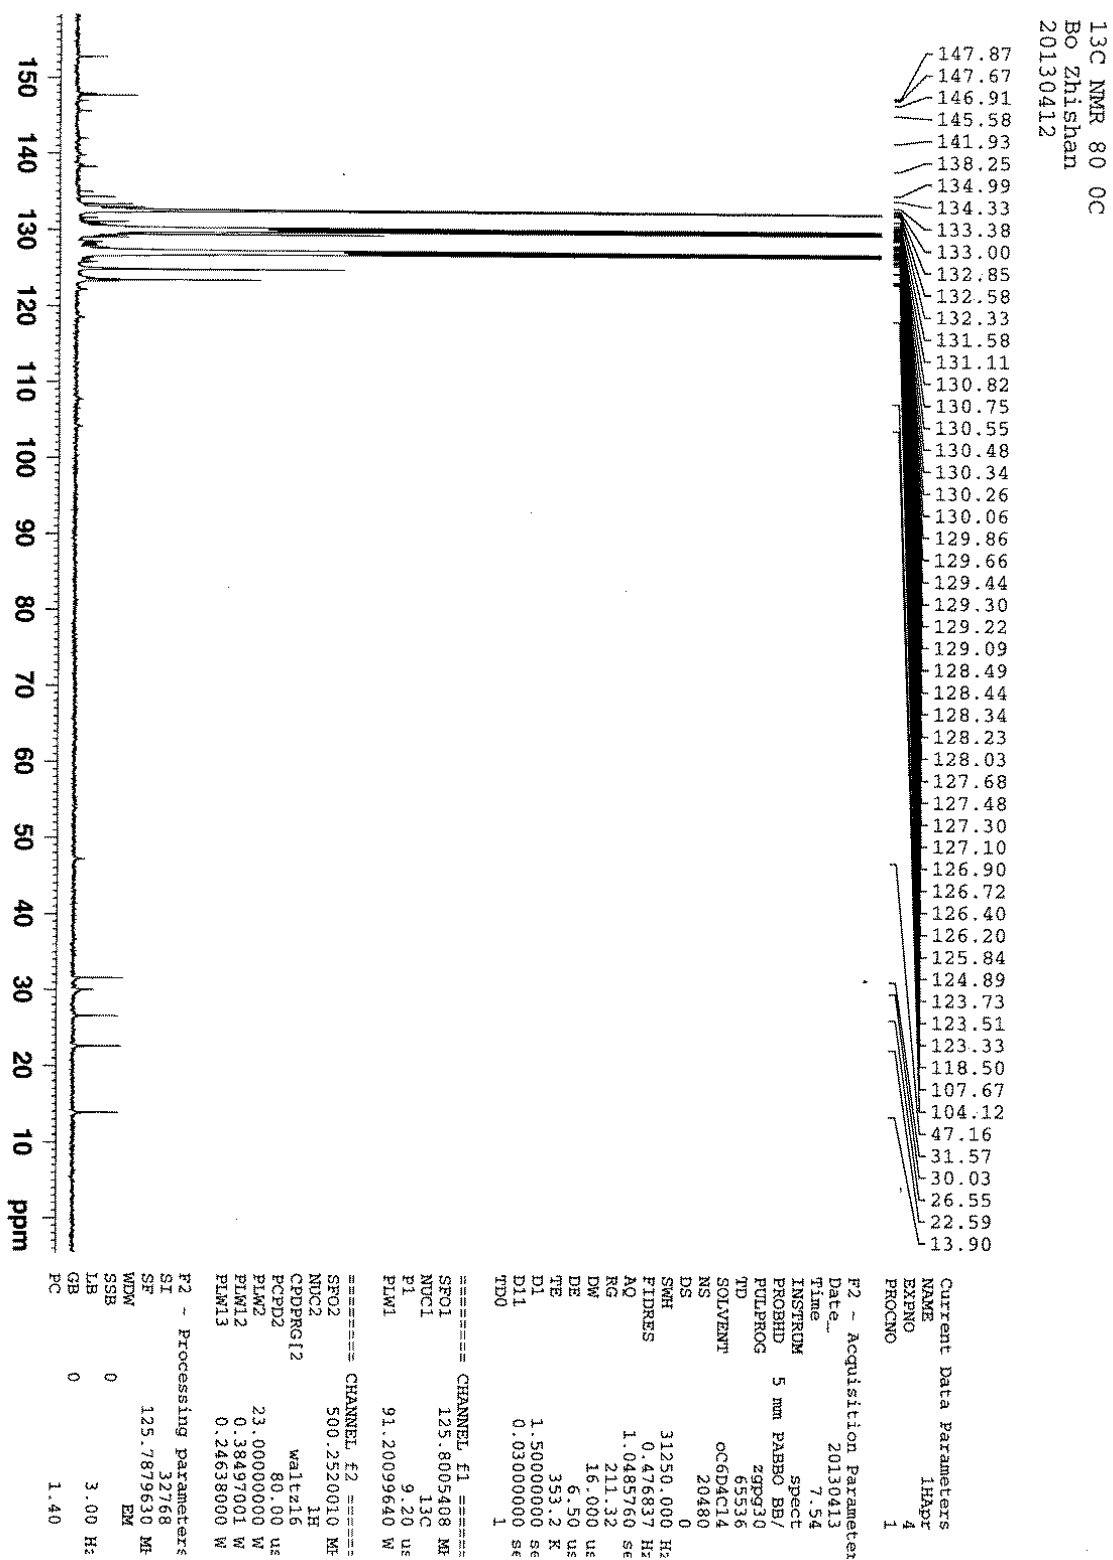

Figure S8. <sup>13</sup>C NMR spectrum of SM-1 (measured in 1,2-dichlorobenzene-d<sub>4</sub> at 80 °C).
